# Supplementary material
Source: publisher site journal article supplement (https://www.dovepress.com/article/277036)
Supplement: Supplementary file 1 [file get_supplementary_file.php]

## Supplementary Table 1 Systematic literature review search terms

| Set # | Searched for                                                                                                                                                                                                                                                                                                                                                                                                                                                                                                                                                                                                                                                                                                                                                                                                                                                          | Results   |
|-------|-----------------------------------------------------------------------------------------------------------------------------------------------------------------------------------------------------------------------------------------------------------------------------------------------------------------------------------------------------------------------------------------------------------------------------------------------------------------------------------------------------------------------------------------------------------------------------------------------------------------------------------------------------------------------------------------------------------------------------------------------------------------------------------------------------------------------------------------------------------------------|-----------|
| S1    | EMB.EXACT.EXPLODE("Behcet disease") OR MESH.EXACT.EXPLODE("Behcet Syndrome") OR TI,AB("Behcet" OR "Behcets" OR "Behcet's" OR "Behçet" OR "Behçets" OR "Behçet's" OR "silk road disease" OR "silkroad disease" OR Adamantiades)                                                                                                                                                                                                                                                                                                                                                                                                                                                                                                                                                                                                                                        | 28,050    |
| S2    | TI,AB((randomi?ed controlled trial) OR RCT OR placebo* OR "randomly allocated" OR (allocated NEAR/2 random*) OR (clinical NEAR/1 trial*) OR ((singl* OR doubl* OR treb* or tripl*) NEAR/1 (blind[*3] OR mask[*3]))) OR EMB.EXACT("clinical trial" OR "randomized controlled trial" OR "controlled clinical trial" OR "multicenter study" OR "phase 1 clinical trial" OR "phase 2 clinical trial" OR "phase 3 clinical trial" OR "phase 4 clinical trial" OR "single blind procedure" OR "double blind procedure" OR "crossover procedure" OR "placebo" OR "prospective study") OR EMB.EXACT.EXPLODE(randomization) OR MESH.EXACT("Randomized Controlled Trials as Topic" OR "Randomized Controlled Trial" OR "Random Allocation" OR "Double Blind Method" OR "Single Blind Method" OR "Clinical Trial" OR Placebos) OR MESH.EXACT.EXPLODE("Clinical Trials as Topic") | 3,626,419 |
| S3    | TI,AB(oral OR mouth OR periodontal OR gums OR gingiva OR stomatitis OR aphthous OR canker OR mucocutaneous) OR EMB.EXACT("aphthous stomatitis") OR MESH.EXACT("Stomatitis, Aphthous")                                                                                                                                                                                                                                                                                                                                                                                                                                                                                                                                                                                                                                                                                 | 1,642,713 |
| S4    | S1 AND S2 AND S3                                                                                                                                                                                                                                                                                                                                                                                                                                                                                                                                                                                                                                                                                                                                                                                                                                                      | 404       |
| S5    | S4 NOT dtype("Conference Abstract")                                                                                                                                                                                                                                                                                                                                                                                                                                                                                                                                                                                                                                                                                                                                                                                                                                   | 310       |

**Supplementary Table 2** Study design and patient demographics of included randomized controlled trials

| Citation                      | Country               | Study duration        | Treatment arms                          | N   | Mean (SD) age, years                       | Males, % |
|-------------------------------|-----------------------|-----------------------|-----------------------------------------|-----|--------------------------------------------|----------|
| Aktulga 1980 <sup>1</sup>     | Turkey                | 6 months              | Colchicine                              | 14  | 34.2 (7.2)                                 | 64.3     |
|                               |                       |                       | Placebo                                 | 14  | 33 (12.8)                                  | 92.9     |
| Davatchi 2009 <sup>2</sup>    | Iran                  | 8 months <sup>a</sup> | Colchicine                              | 136 | 31.2 (8.29)                                | 32.3     |
|                               |                       |                       | Placebo                                 | 146 |                                            |          |
| Yurdakul 2001 <sup>3</sup>    | Turkey                | 24 months             | Colchicine                              | 58  | Females: 26.7 (4.8)<br>Males: 27 (5.5)     | 51.7     |
|                               |                       |                       | Placebo                                 | 58  | Females: 27.2 (5.2)<br>Males: 27.3 (5.3)   | 51.7     |
| Calguneri 1996 <sup>4</sup>   | Turkey                | 16 months             | Colchicine                              | 60  | 36.1 (10.0)                                | 50       |
|                               |                       |                       | Colchicine + benzathine penicillin      | 95  | 37.4 (9.4)                                 | 53.2     |
| Hatemi 2015 <sup>5</sup>      | Turkey, United States | 24 weeks <sup>b</sup> | Apremilast                              | 55  | 34.3                                       | 29       |
|                               |                       |                       | Placebo                                 | 56  | 34.7                                       | 32       |
| Hatemi 2019 <sup>6</sup>      | Multi-country         | 64 weeks <sup>c</sup> | Apremilast                              | 104 | 39.4                                       | 38.5     |
|                               |                       |                       | Placebo                                 | 103 | 40.6                                       | 38.8     |
| Alpsoy 2002 <sup>7</sup>      | Turkey                | 12 weeks              | Interferon $\alpha$ -2a                 | 23  | 32.82 (8.17)                               | 69.6     |
|                               |                       |                       | Placebo                                 | 21  | 31.89 (7.85)                               | 52.4     |
| Hamuryudan 1991 <sup>8</sup>  | Turkey                | 24 weeks              | Interferon $\alpha$ -2c hydrogel        | 30  | NR                                         | 41.3     |
|                               |                       |                       | Placebo                                 | 31  | NR                                         |          |
| Kilic 2009 <sup>9</sup>       | Turkey                | 12 weeks              | Interferon- $\alpha$ lozenges (1000 IU) | 31  | 37                                         | 35.5     |
|                               |                       |                       | Interferon- $\alpha$ lozenges (2000 IU) | 26  | 36                                         | 26.9     |
|                               |                       |                       | Placebo                                 | 27  | 36                                         | 25.9     |
| Hamuryudan 1998 <sup>10</sup> | Turkey                | 24 weeks              | Thalidomide (100 mg/day)                | 31  | 27.6                                       | 100      |
|                               |                       |                       | Thalidomide (300 mg/day)                | 32  | 27.8                                       | 100      |
|                               |                       |                       | Placebo                                 | 32  | 26.7                                       | 100      |
| Fani 2012 <sup>11</sup>       | Iran                  | 1 week                | Triamcinolone acetonide                 | 30  | 35.47 (8.85)                               | 26.7     |
|                               |                       |                       | Phenytoin syrup                         | 30  | 38.77 (9.4)                                | 26.7     |
| Masuda 1989 <sup>12</sup>     | Japan                 | 16 weeks <sup>d</sup> | Cyclosporine                            | 47  | NR                                         | NR       |
|                               |                       |                       | Colchicine                              | 49  | NR                                         | NR       |
| Melikoğlu 2005 <sup>13</sup>  | Turkey                | 4 weeks               | Etanercept                              | 20  | 28.5 (5.3)                                 | 100      |
|                               |                       |                       | Placebo                                 | 20  | 30.8 (6.2)                                 | 100      |
| Yazici 1990 <sup>14</sup>     | Turkey                | 24 months             | Azathioprine                            | 37  | Group 1: 31.8 (4.3)<br>Group 2: 32.1 (5.3) | 100      |
|                               |                       |                       | Placebo                                 | 36  | Group 1: 30.5 (5.2)<br>Group 2: 31.5 (6.5) | 100      |

**Notes:** <sup>a</sup> Crossover trial; patients received 4 months of treatment, followed by crossover and an additional 4 months of treatment.

<sup>b</sup> Trial included a 12-week, placebo-controlled, active treatment phase, followed by a 12-week apremilast-exposure period.

<sup>c</sup> Trial included a 12-week, placebo-controlled active treatment phase, followed by a 52-week apremilast-exposure period.

<sup>d</sup> Patients had the option to continue cyclosporine in a long-term open study.

**Abbreviations:** IU, international unit; NR, not reported.

## References

1. Aktulga E, Altac M, Muftuoglu A, Ozyazgan Y, Pazarli H, Tuzun Y, et al. A double blind study of colchicine in Behçet's disease. *Haematologica*. 1980;65(3):399-402.
2. Davatchi F, Sadeghi Abdollahi B, Tehrani Banihashemi A, Shahram F, Nadji A, Shams H, et al. Colchicine versus placebo in Behçet's disease: randomized, double-blind, controlled crossover trial. *Mod Rheumatol*. 2009;19(5):542-549.
3. Yurdakul S, Mat C, Tuzun Y, Ozyazgan Y, Hamuryudan V, Uysal O, et al. A double-blind trial of colchicine in Behçet's syndrome. *Arthritis Rheum*. 2001;44(11):2686-2692.
4. Calguneri M, Ertenli I, Kiraz S, Erman M, Celik I. Effect of prophylactic benzathine penicillin on mucocutaneous symptoms of Behçet's disease. *Dermatology*. 1996;192(2):125-128.
5. Hatemi G, Melikoğlu M, Tunc R, Korkmaz C, Ozturk BT, Mat C, et al. Apremilast for Behçet's syndrome - a phase 2, placebo-controlled study. *N Engl J Med*. 2015;372(16):1510-1518.
6. Hatemi G, Mahr A, Ishigatsubo Y, Song YW, Takeno M, Kim D, et al. Trial of apremilast for oral ulcers in Behçet's syndrome. *N Engl J Med*. 2019;381(20):1918-1928.
7. Alpsoy E, Durusoy C, Yilmaz E, Ozgurel Y, Ermis O, Yazar S, et al. Interferon alfa-2a in the treatment of Behçet disease: a randomized placebo-controlled and double-blind study. *Arch Dermatol*. 2002;138(4):467-471.
8. Hamuryudan V, Yurdakul S, Rosenkaimer F, Yazici H. Inefficacy of topical alpha interferon in the treatment of oral ulcers of Behçet's syndrome: a randomized, double blind trial. *Br J Rheumatol*. 1991;30(5):395-396.
9. Kiliç H, Zeytin HE, Korkmaz C, Mat C, Gül A, Coşan F, et al. Low-dose natural human interferon-alpha lozenges in the treatment of Behçet's syndrome. *Rheumatology*. 2009;48(11):1388-1391.
10. Hamuryudan V, Mat C, Saip S, Ozyazgan Y, Siva A, Yurdakul S, et al. Thalidomide in the treatment of the mucocutaneous lesions of the Behçet syndrome. A randomized, double-blind, placebo-controlled trial. *Ann Intern Med*. 1998;128(6):443-450.
11. Fani MM, Ebrahimi H, Pourshahidi S, Aflaki E, Shafiee Sarvestani S. Comparing the effect of phenytoin syrup and triamcinolone acetonide ointment on aphthous ulcers in patients with Behçet's syndrome. *Iran Red Crescent Med J*. 2012;14(2):75-78.
12. Masuda K, Nakajima A, Urayama A, Nakae K, Kogure M, Inaba G. Double-masked trial of cyclosporin versus colchicine and long-term open study of cyclosporin in Behçet's disease. *Lancet*. 1989;1(8647):1093-1096.
13. Melikoğlu M, Fresko I, Mat C, Ozyazgan Y, Gogus F, Yurdakul S, et al. Short-term trial of etanercept in Behçet's disease: a double blind, placebo controlled study. *J Rheumatol*. 2005;32(1):98-105.
14. Yazici H, Pazarli H, Barnes CG, Tuzun Y, Ozyazgan Y, Silman A, et al. A controlled trial of azathioprine in Behçet's syndrome. *N Engl J Med*. 1990;322(5):281-285.
